# Supplementary material for: Photophysical properties of N-alkylated azahelicene derivatives as DNA intercalators: counterion effects
Source: Royal Society of Chemistry journal article supplement (doi:10.1039/b9pp00015a), 2009-09-17
Supplement: b9pp00015a.pdf [file b9pp00015a.pdf]

# Supporting Information

## **Photophysical properties of N-alkylated aza-helicene derivatives as DNA intercalators: counterion effects**

**Rosita Passeri, Gian Gaetano Aloisi, Fausto Elisei, Loredana Latterini\***

*Dipartimento di Chimica and Centro di Eccellenza Materiali Innovativi Nanostrutturati  
(CEMIN), Università di Perugia*

*Via Elce di Sotto, 8, 06123 Perugia, Italy*

**Tullio Caronna, Francesca Fontana, Isabella Natali Sora**

*Dipartimento di Ingegneria Industriale, Università di Bergamo  
Viale Marconi, 5, 24044 Dalmine, Bergamo, Italy*

To whom correspondence should be addressed. e-mail: [loredana@unipg.it](mailto:loredana@unipg.it), telephone  
+390755855636; fax +390755855598

|          |   |
|----------|---|
| NMR data | 2 |
| Figures  | 3 |

NMR data (Chemical shift ( $\delta$ , ppm, reference internal TMS) and coupling constants (Hz)) of **1a** in different solvent.

|                 | ( <b>1a</b> ) CDCl <sub>3</sub> d (ppm)<br>J(Hz) | ( <b>1a</b> ) CD <sub>3</sub> OD d (ppm)<br>J(Hz) |
|-----------------|--------------------------------------------------|---------------------------------------------------|
| H1              | 8.79 dd 1.4; 8.5                                 | 8.77 dd 1.5; 8.6                                  |
| H2              | 7.65 ddd 1.2; 7.1; 8.5                           | 7.75-7.72 m                                       |
| H3              | 8.01 ddd 1.4; 7.1; 8.7                           | 8.11 ddd 1.5; 7.1; 8.7                            |
| H4              | 8.31 dd 1.2; 8.7                                 | 8.57 dd 1.2; 8.7                                  |
| H6              | 11.65 s                                          | 10.14 s                                           |
| H7              | 8.78 d 8.3                                       | 8.40 d 8.3                                        |
| H8              | 8.22 d 8.3                                       | 8.38 d 8.3                                        |
| H9              | 7.98 d 8.7                                       | 7.98 d 8.6                                        |
| H10             | 8.24 d 8.7                                       | 8.37 d 8.6                                        |
| H11             | 8.07 dd 1.4; 8.3                                 | 8.17 dd 1.5; 8.1                                  |
| H12             | 7.69 ddd 1.2; 7.0; 8.3                           | 7.75-7.72 m                                       |
| H13             | 7.44 ddd 1.4; 7.0; 8.5                           | 7.47 ddd 1.5; 7.0; 8.5                            |
| H14             | 8.40 br d 8.5                                    | 8.40 br d 8.5                                     |
| CH <sub>3</sub> | 5.02 s                                           | 5.02 s                                            |

The data are in agreement with literature data [C. Bazzini, et al. , *Eur. J. Org. Chem.*, 2005 1247-1257] obtained for the Aza[5]helicene, parent compound. In the present experimental conditions, no evidences for the counterion effects on the <sup>1</sup>H NMR data were observed.

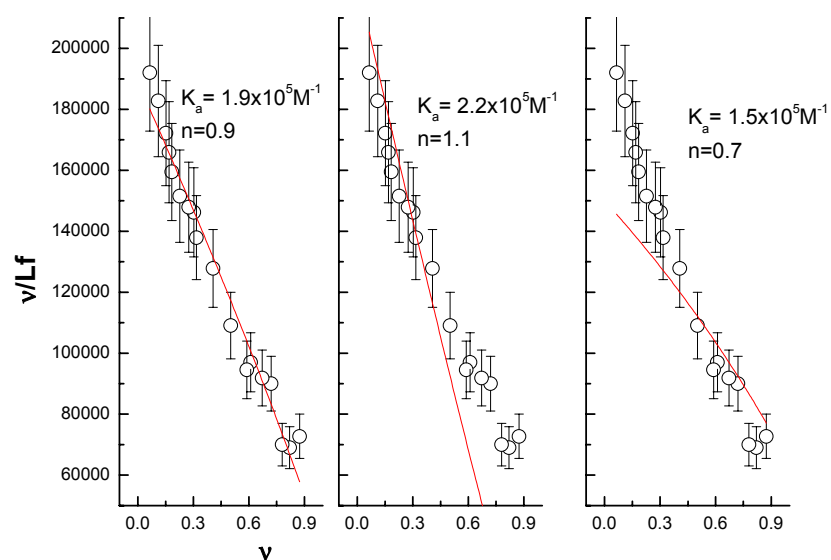

Figure SI1. Scatchard-plots for **1a** DNA system (circle) and fitting curves determined by use of McGhee Von Hippel model (red line) obtained by no constrains on binding parameters (left panel) and setting the  $n$  (middle panel) and  $K_a$  (right panel) values outside the experimental errors.

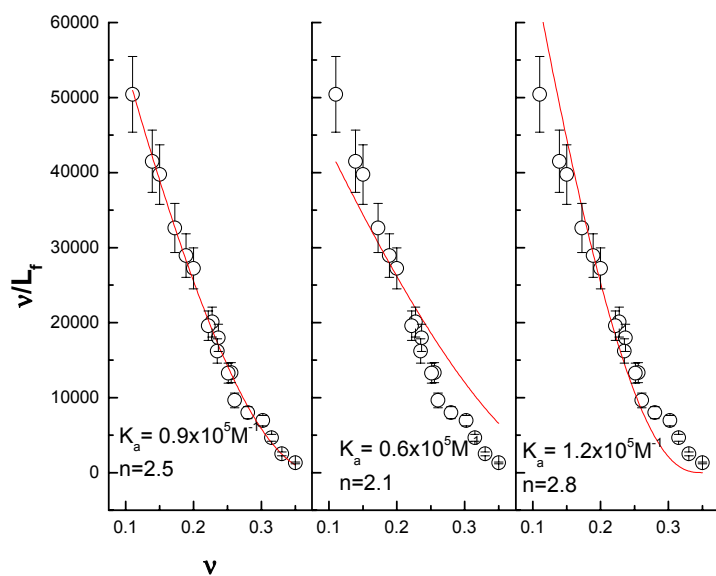

Figure SI2. Scatchard-plots for **1b** DNA system (circle) and fitting curves determined by use of McGhee Von Hippel model (red line) obtained by no constrains on binding parameters (left panel) and setting the  $n$  (middle panel) and  $K_a$  (right panel) values outside the experimental errors.

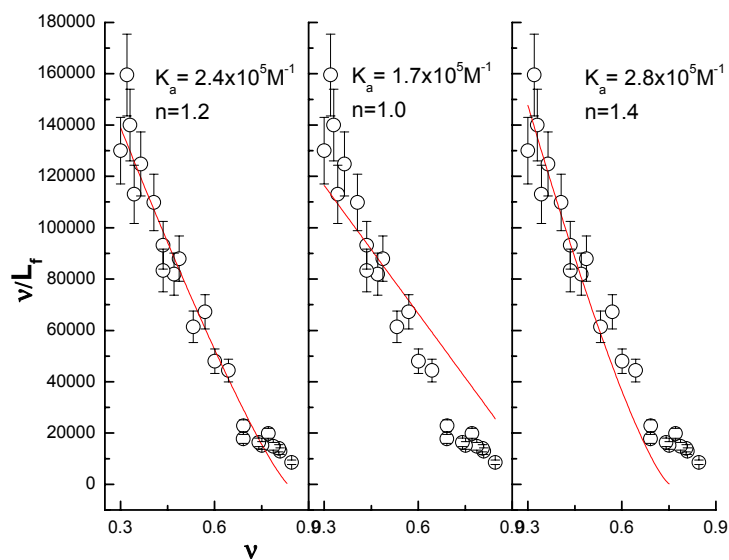

Figure SI3. Scatchard-plots for **1c** DNA system (circle) and fitting curves determined by use of McGhee Von Hippel model (red line) obtained by use of no constraints on binding parameters (left panel) and setting the  $n$  (middle panel) and  $K_a$  (right panel) values outside the experimental errors.

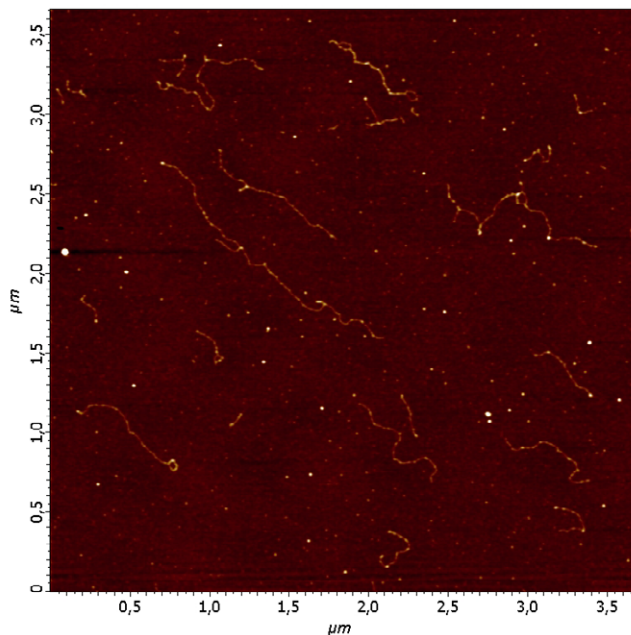

Figure SI4. AFM images of plasmid DNA in the presence of **1a**. and length distribution histogram.

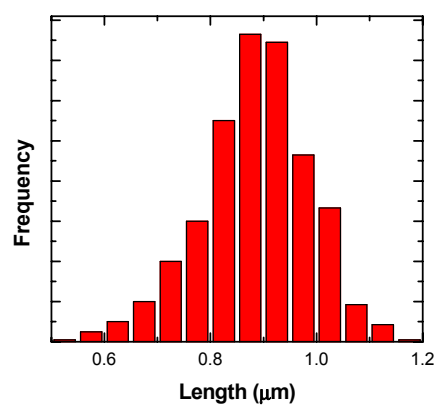

Figure SI5. DNA length distribution histogram in the presence of **1a**

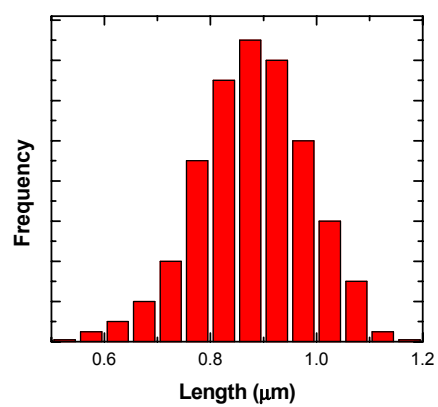

Figure SI6. DNA length distribution histogram in the presence of **1c**
